# Supplementary material
Source: Springer Nature journal article supplement (https://www.springermedizin.de/resource/supplementary/12903_2008_116_MOESM1_ESM.pdf/9517490)
Supplement: MOESM1 [file 9517490]

**Block 1**

DEMOGRAPHIC  
CHARACTERISTICS

**Block 2**

SOCIOECONOMIC  
CONDITIONS

**Block 3**

USE OF DENTAL  
SERVICES

TOBACCO  
ALCOHOL PROBLEMS

**DENTAL PAIN**
